# Supplementary material for: Microneedles loaded with anti-PD-1–cisplatin nanoparticles for synergistic cancer immuno-chemotherapy
Source: Royal Society of Chemistry journal article supplement (doi:10.1039/d0nr04213g), 2020-01-01
Supplement: d0nr04213g1.pdf [file d0nr04213g1.pdf]

# **Microneedles Loaded with Anti-PD-1-Cisplatin-Nanoparticles for Synergistic Cancer Immuno-Chemotherapy**

*Xinmiao Lan<sup>1</sup>, Wangyong Zhu<sup>1</sup>, Xinshuo Huang<sup>2,3</sup>, Yingjie Yu<sup>4</sup>, Haihua Xiao<sup>5,6</sup>, Lijian Jin<sup>7</sup>, Xi Xie<sup>2</sup>, Juncong She<sup>2</sup>, Vivian Wai Yan Lui<sup>8</sup>, Hui-Jiuan Chen<sup>2,3\*</sup>, Yu-xiong Su<sup>1,\*</sup>*

*<sup>1</sup> Discipline of Oral and Maxillofacial Surgery, Faculty of Dentistry, The University of Hong Kong, Hong Kong SAR, China*

*<sup>2</sup> State Key Laboratory of Optoelectronic Materials and Technologies, School of Electronics and Information Technology, Sun Yat-Sen University, Guangzhou, China*

*<sup>3</sup> The First Affiliated Hospital of Sun Yat-Sen University, Guangzhou, China*

*<sup>4</sup> Institute of Translational Medicine, The First Affiliated Hospital of Shenzhen University, Shenzhen Second People's Hospital, Shenzhen, China*

*<sup>5</sup> Beijing National Laboratory for Molecular Sciences, State Key Laboratory of Polymer Physics and Chemistry, Institute of Chemistry, Chinese Academy of Sciences, Beijing, China*

*<sup>6</sup> University of Chinese Academy of Sciences, Beijing, China*

*<sup>7</sup> Discipline of Periodontology and Implant Dentistry, Faculty of Dentistry, The University of Hong Kong, Hong Kong SAR, China*

*<sup>8</sup> School of Biomedical Sciences, Faculty of Medicine, The Chinese University of Hong Kong, Hong Kong S.A.R., China*

*\*Corresponding author*

Email: Yu-xiong Su: [richsu@hku.hk](mailto:richsu@hku.hk); Hui-jiuan Chen: [chenhuix5@mail.sysu.edu.cn](mailto:chenhuix5@mail.sysu.edu.cn)

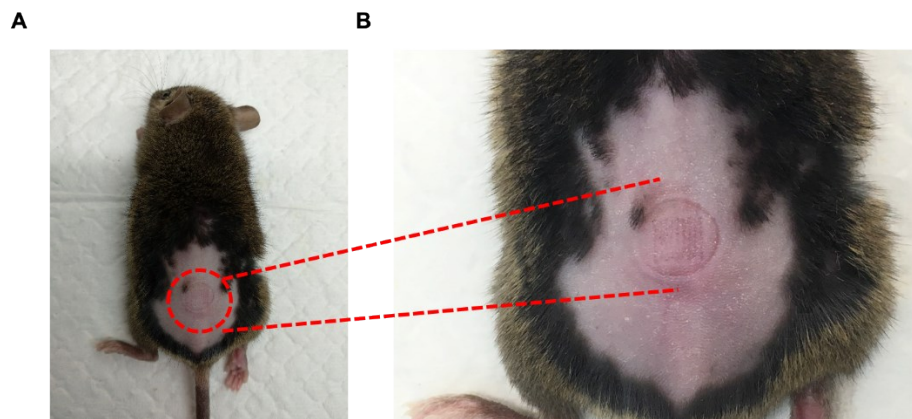

**Figure S1.** (A) Animal image after treated with MNs. (B) Magnified area on mouse skin after MN treatment.

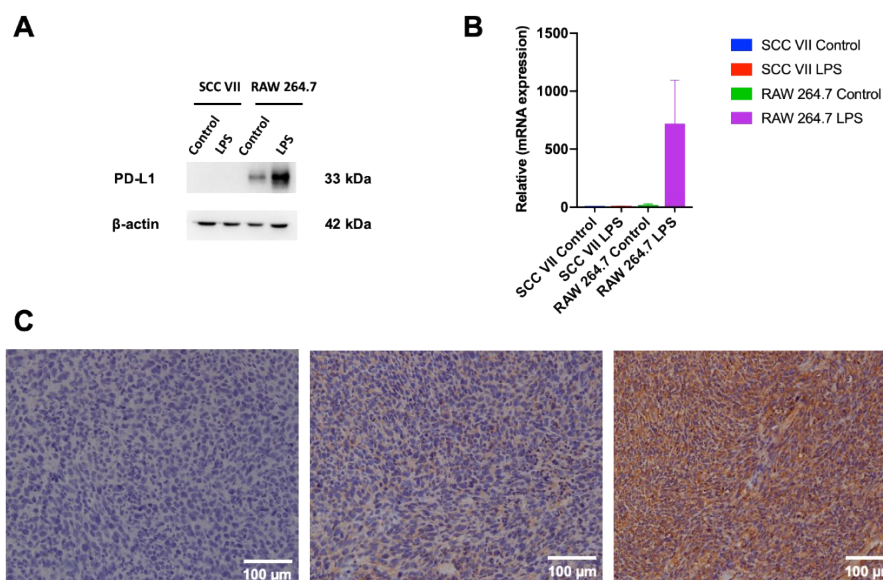

**Figure S2.** (A) The PD-L1 protein expression determined through western blot. (B) mRNA expression evaluated using a TaqMan qPCR probe. (C) Representative micrographs of PD-L1 expression detected through IHC on tumor sections. Negative PD-L1 expression (partial or complete cell membrane staining less than 1 %); low PD-L1 expression (approximately 50 % of membranes were stained); high PD-L1 expression (over 50 % of cell membranes were stained).

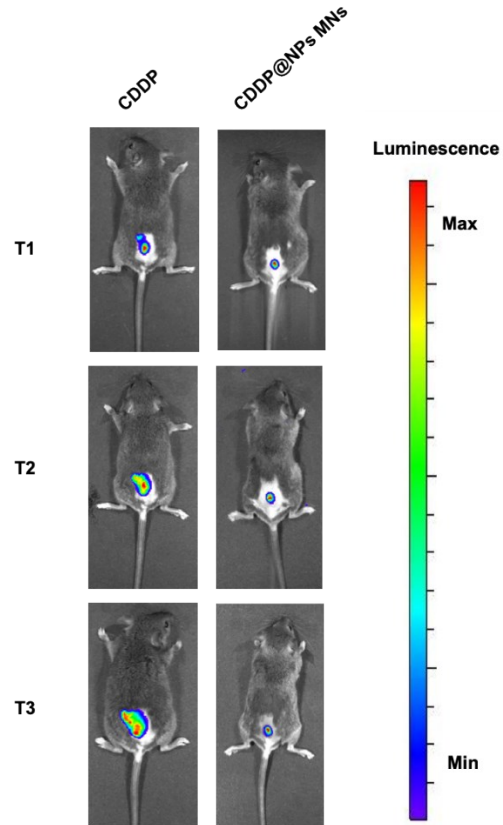

**Figure S3. Antitumor efficacy *in vivo*.** Representative bioluminescent images of mice with various treatments CDDP and CDDP@NPs MNs at different time points (T1: 3 days after 1<sup>st</sup> treatment, T2: 3 days after 2<sup>nd</sup> treatment, and T3: 3 days after 3<sup>rd</sup> treatment).

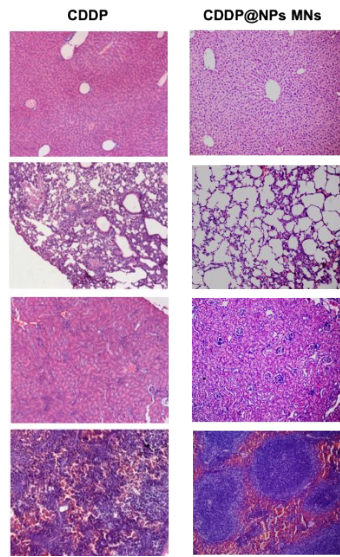

**Figure S4. Systemic effects.** H&E staining of main organs (liver, lung, kidney and spleen) in CDDP and CDDP@NPs MNs.

#### S5. Supplemental Information of the microneedle morphology.

The morphology of microneedles was examined by SEM with 75 deg tilt angle, showing the microneedles reveal sharp V-shape and the length of microneedles is about 568  $\mu\text{m}$ . The accurate length of microneedles  $L=568/\sin(75^\circ)= 588 \mu\text{m}$ .

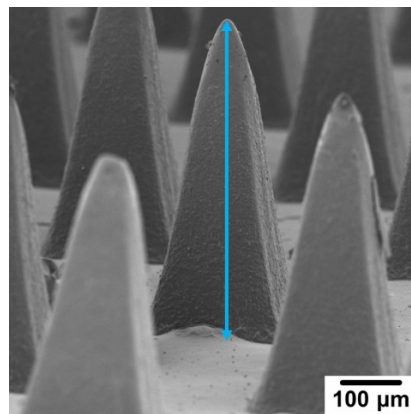

**Figure S5.** SEM image showing microneedles taken with 75 deg tilt angle. The accurate length of microneedles is around 588  $\mu\text{m}$ .
